# Supplementary material for: Genome-wide meta-analysis of iron status biomarkers and the effect of iron on all-cause mortality in HUNT
Source: PubMed Central journal article supplement (PMC9203493; doi:10.1038/s42003-022-03529-z), 2022-06-16
Supplement: 42003_2022_3529_MOESM2_ESM.pdf [file 42003_2022_3529_MOESM2_ESM.pdf]

Description of Additional Supplementary Files for:

## Genome-wide meta-analysis of iron status biomarkers and the effect of iron on all-cause mortality in HUNT

Marta R Moksnes,<sup>1,†</sup> Sarah E Graham,<sup>2</sup> Kuan-Han Wu<sup>3</sup>, Ailin Falkmo Hansen,<sup>1</sup> Sarah A Gagliano Taliun,<sup>4,5</sup> Wei Zhou,<sup>6,7</sup> Ketil Thorstensen,<sup>8</sup> Lars G Fritsche,<sup>9,10</sup> Dipender Gill,<sup>11,12,13,14</sup> Amy Mason,<sup>15</sup> Francesco Cucca,<sup>16,17</sup> David Schlessinger,<sup>18</sup> Gonçalo R Abecasis,<sup>10</sup> Stephen Burgess,<sup>15,19</sup> Bjørn Olav Åsvold,<sup>1,20,21</sup> Jonas B Nielsen,<sup>1,2,22,23</sup> Kristian Hveem,<sup>1,21,\*</sup> Cristen J Willer,<sup>1,2,5,24,\*</sup> Ben M Brumpton.<sup>1,21,25,†\*</sup>

- 1 K.G. Jebsen Center for Genetic Epidemiology, Department of Public Health and Nursing, NTNU – Norwegian University of Science and Technology, Trondheim, Norway
- 2 Division of Cardiovascular Medicine, Department of Internal Medicine, University of Michigan, Ann Arbor, MI, USA
- 3 Department of Computational Medicine and Bioinformatics, University of Michigan, Ann Arbor, MI, USA
- 4 Department of Medicine and Department of Neurosciences, Université de Montréal, Montréal, QC, Canada
- 5 Montréal Heart Institute, Montréal, QC H1T 1C8, Canada
- 6 Analytic and Translational Genetics Unit, Department of Medicine, Massachusetts General Hospital, Boston, MA, USA
- 7 Stanley Center for Psychiatric Research, Broad Institute of MIT and Harvard, Cambridge, MA, USA
- 8 Department of Clinical Chemistry, St. Olavs hospital Trondheim University Hospital, Trondheim, Norway
- 9 Department of Biostatistics, University of Michigan School of Public Health, Ann Arbor, MI, USA
- 10 Center for Statistical Genetics, University of Michigan School of Public Health, Ann Arbor, MI, USA
- 11 Department of Epidemiology and Biostatistics, School of Public Health, Imperial College London, London, UK
- 12 Clinical Pharmacology and Therapeutics Section, Institute for Infection and Immunity, St George's, University of London, London, UK
- 13 Clinical Pharmacology Group, Pharmacy and Medicines Directorate, St George's University Hospitals NHS Foundation Trust, London, UK
- 14 Novo Nordisk Research Centre Oxford, Old Road Campus, Oxford, UK
- 15 British Heart Foundation Cardiovascular Epidemiology Unit, Department of Public Health and Primary Care, University of Cambridge, Cambridge, UK
- 16 Istituto di Ricerca Genetica e Biomedica, Consiglio Nazionale delle Ricerche (CNR), Cagliari, Italy
- 17 Dipartimento di Scienze Biomediche, Università degli Studi di Sassari, Sassari, Italy
- 18 Laboratory of Genetics, National Institute on Aging, US National Institutes of Health, Baltimore, MD, USA
- 19 Medical Research Council Biostatistics Unit, University of Cambridge, Cambridge, UK
- 20 Department of Endocrinology, Clinic of Medicine, St. Olavs hospital Trondheim University Hospital, Trondheim, Norway
- 21 HUNT Research Centre, Department of Public Health and Nursing, NTNU – Norwegian University of Science and Technology, Levanger, Norway
- 22 Department of Epidemiology Research, Statens Serum Institute, Copenhagen, Denmark
- 23 Department of Cardiology, Copenhagen University Hospital, Copenhagen, Denmark
- 24 Department of Human Genetics, University of Michigan, Ann Arbor, MI, USA
- 25 Clinic of Medicine, St. Olavs hospital Trondheim University Hospital, Trondheim, Norway

\* These authors jointly supervised this work.

†Corresponding authors:

[marta.r.moksnes@ntnu.no](mailto:marta.r.moksnes@ntnu.no)

[ben.brumpton@ntnu.no](mailto:ben.brumpton@ntnu.no)

Supplementary Data 1: Index variants in genome-wide significant loci from meta-analysis of HUNT, MGI, SardinIA, deCODE, Interval and DBDS

Supplementary Data 2: Descriptive statistics per study

Supplementary Data 3: Protein-altering custom content genotyped variants associated ( $p$ -value  $< 5E-8$ ) with iron traits in HUNT

Supplementary Data 4: Novel protein-altering variants in strong LD ( $D'=1$  or  $R^2 > 0.8$ ) with meta-analysis index variants

Supplementary Data 5: LD Score regression: Genetic correlation ( $r_g$ )  $\pm$  standard error and  $p$ -values are given for each pair of iron status biomarkers. The matrix is symmetrical around the diagonal.

Supplementary Data 6: Bayesian colocalization analysis of iron trait loci (index variant  $\pm$  500Kb) and cis-eQTLs per tissue from GTEx v8

Supplementary Data 7: DEPICT: Top 10 tissues prioritized for trait associated loci

Supplementary Data 8: DEPICT: Genes prioritized at  $FDR < 0.05$

Supplementary Data 9: DEPICT: Top 10 gene sets prioritized per trait

Supplementary Data 10: Polygenic Priority Scores for the 1% top ranked genes for serum iron.

Supplementary Data 11: Polygenic Priority Scores for the 1% top ranked genes for serum ferritin.

Supplementary Data 12: Polygenic Priority Scores for the 1% top ranked genes for total iron binding capacity.

Supplementary Data 13: Polygenic Priority Scores for the 1% top ranked genes for transferrin saturation percentage.

Supplementary Data 14: Single variant PheWAS (phecodes)

Supplementary Data 15: Single variant PheWAS (continuous traits and biomarkers)

Supplementary Data 16: Single variant PheWAS (red blood cell related traits)

Supplementary Data 17: GRS-PheWAS (phecodes)

Supplementary Data 18: GRS-PheWAS (continuous traits and biomarkers)

[Supplementary Data 19: GRS-PheWAS \(red blood cell related traits\)](#)

[Supplementary Data 20: Non-linear Mendelian Randomization: Effect of serum iron on all-cause mortality in HUNT per quantile of the residual iron distribution](#)

[Supplementary Data 21: Non-linear Mendelian Randomization: Effect of serum ferritin on all-cause mortality in HUNT per stratum](#)

[Supplementary Data 22: Non-linear Mendelian Randomization: Effect of Transferrin Saturation Percentage \(TSP\) on all-cause mortality in HUNT per quantile of the TSP residual distribution](#)

[Supplementary Data 23: Non-linear Mendelian Randomization: Effect of total iron binding capacity \(TIBC\) on all-cause mortality per quantile of the residual TIBC distribution](#)
